# Supplementary material for: Depletion of NEAT1 lncRNA attenuates nucleolar stress by releasing sequestered P54nrb and PSF to facilitate c-Myc translation
Source: PubMed Central journal article supplement (PMC5348036; doi:10.1371/journal.pone.0173494), 2017-03-13
Supplement: pone.0173494.s007.pdf [file pone.0173494.s007.pdf]

1 **Supplemental Materials and Methods**

2 **Antibodies:**

3 For western blotting, anti-P54nrb (sc-376865), anti-hnRNPk (sc-28380), and anti-GAPDH (sc-  
4 32233) antibodies were purchased from Santa Cruz Biotechnology. Anti-FUS (ab84078), anti-  
5 PSPC1 (ab104238), anti-CIRBP (ab191885), anti-RUNX3 (ab135248), and anti-p53 (ab28) were  
6 purchased from Abcam. Anti-c-Myc (9402) antibody was purchased from cell signaling. Anti-  
7 PARP (4338-MC-50) antibody was purchased from TREVIGEN.

8

9 For IF, anti-Fibrillarin antibody (ab5821), anti-RPL5 (ab186857), and anti-BrdU (ab6326)  
10 antibodies were purchased from Abcam. Anti-P54nrb antibody (sc-376865) was purchased from  
11 Santa Cruz Biotechnology. Anti-PSF antibody (p2860) was purchased from Sigma-Aldrich.

12

13 For RNA-IP, anti-P54nrb antibody (05-950) was purchased from Millipore, and anti-PSF  
14 antibody (p2860) was purchased from Sigma-Aldrich.

15

16 **Primer and probe sequences:**

17 The primers for NEAT1 RNA-FISH probe sub-cloning are: 5'-hNEAT1-Forward: 5' - TAG TTG  
18 TGG GGG AGG AAG TG -3' and 5'-hNEAT1-Reverse: 5' - TAA TAC GAC TCA CTA TAG  
19 GGT GGC ATG GAC AAG TTG AAG A -3'. Underlined italics indicate T7 promoter sequence.

20

21 The primer-probe sets for qRT-PCR are: NEAT1-Forward: 5' - TGG TAA GCC CGG GAC AGT  
22 AA -3'; NEAT1-Reverse: 5' - CAG CGG GAA GGC CTC TCT -3'; NEAT1-Probe: 5' - CCG  
23 AGT GGC TGT TGG AGT CGG TAT TG -3'; c-Myc-Forward: 5' - TGG TCT TCC CCT ACC

24 CTC TCA -3'; c-Myc-Reverse: 5' - AGA ATC CGA GGA CGG AGA GAA -3'; c-Myc-Probe:  
25 5' - CGA CAG CAG CTC GCC CAA GTC C -3'; Pre-NCL1-Forward: 5' - CTC TGT CAC TGG  
26 TAT CTT TTC CC -3'; pre-NCL1-Reverse: 5' - CAA AAC CAA ACC TAG AAC ACC AAA  
27 TG -3'; Pre-NCL1-Probe: 5' - CAA GGC TAC TTT CTG TGG GAT GGC T -3'; LDLr-Forward:  
28 5' - CAT TCA CCA AAT GAT GCC ACT T -3'; LDLr-Reverse: 5' - CGG GTG TCT CAG GCA  
29 CTT AAT AA -3'; LDLr-Probe: 5' - AGA GCC TGA GTC ACC GGT CAC CCT TAA -3'; 28S-  
30 Forward: 5' - CAG GTC TCC AAG GTG AAC AG -3', 28s-Reverse: 5' - CTT AGA GCC AAT  
31 CCT TAT CCC G -3', 28S-Probe: 5' - TCC CTT ACC TAC ATT GTT CCA ACA TGC C -3';  
32 47S rRNA precursor-Forward: 5' - TGT CAG GCG TTC TCG TCT C -3'; and 47S rRNA  
33 precursor-Reverse: 5' -AGCACGACGTCACCACATC -3'. Primer probe sets for p21<sup>Waf1/Cip1</sup> and  
34 Gadd45a were purchased from Thermo Fisher Scientific.

35

#### 36 **siRNAs:**

37 PSF siRNA-sense: 5'-CAG UCA UUG UGG AAC CAC UUG AAC A-5', and anti-sense 5'-  
38 UGU UCA AGU GGU UCC ACA AUG ACU G-3'; FUS siRNA-sense: 5' - CGG GAC AGC  
39 CCA UGA UUA AUU UGU A -5', and anti-sense 5'-UAC AAA UUA AUC AUG GGC UGU  
40 CCC G -3'; RUNX3 siRNA-sense: 5' - CCC UGA CCA UCA CUG UGU UCA CCA A -5', and  
41 anti-sense 5' - UUG GUG AAC ACA GUG AUG GUC AGG G -3'; CIRBP siRNA-sense: 5'-  
42 GGA GGC UCC AGA GAC UAC UAU AGC A-5', and anti-sense 5'-UGC UAU AGU AGU  
43 CUC UGG AGC CUC C -3'. siRNA for P54nrb (s9612 and s9614) and PSPC1 (s30594) were  
44 purchased from Life Technologies.

45

#### 46 **ASOs:**

47 ASOs used in this study all are 5-10-5 gapmer design with 10 deoxyribonucleotides in the middle  
48 flanked at both ends by five 2'-O-methoxyethyl (2'-MOE) modified ribonucleotides, and is fully  
49 phosphorothioate (PS) modified. NEAT1 ASO-1: 5'-ATG GGC TCT GGA ACA AGC AT-3';  
50 NEAT1 ASO-2: 5'-CCA TAA GCT CAT CTG CAA AC-3'; Control ASO-1 (non-target): 5'-  
51 CCT TCC CTG AAG GTT CCT CC-3'; Control ASO-2 (Pten): 5'-CTG CTA GCC TCT GGA  
52 TTT GA-3'; Control ASO-3 (Malat1): 5'-TGC CTT TAG GAT TCT AGA CA-3'.

53

#### 54 **RNA-FISH and IF:**

55 Cells seeded on glass-bottom culture dishes (MatTek) were fixed at room temperature for 30 min  
56 with 4% formaldehyde in PBS and permeabilized for 5 min with 0.1% Triton X-100 in PBS. For  
57 NEAT1 FISH, fluorescently labeled RNA probes were generated using FISH Tag™ RNA  
58 Multicolor Kit (Thermo Fisher Scientific) according to the manufacturer's instructions. After  
59 washing twice with 1×PBS and once with 2×saline-sodium citrate (SSC), permeabilized cells  
60 were incubated for overnight at 55 °C with RNA probes in hybridization solution (50%  
61 formamide, 2×SSC, 5% dextran sulfate, 0.5 M EDTA, 0.01% Tween-20, 100 µg/mL yeast tRNA  
62 , and 1X Denhardt's salt). Cells were washed twice in wash buffer (0.2× SSC and 50%  
63 formamide) at 55 °C for 30 min each, and mounted using Prolong Gold anti-fade reagent with  
64 DAPI (Molecular Probes). For indirect IF staining, fixed and permeabilized cells were blocked in  
65 blocking buffer (1 mg/ml BSA in PBS) at room temperature for 30 mins, and incubated with  
66 primary antibodies in blocking buffer at room temperature for 2 hrs. After washing three times in  
67 washing buffer (0.1% Tween-20 in PBS) for 5 mins each, cells were incubated with secondary  
68 antibodies in blocking buffer at room temperature for 1 hrs. Finally, cells were washed three  
69 times in washing buffer for 5 mins each and mounted using Prolong Gold anti-fade reagent with

70 DAPI (Molecular Probes). Images were generated by Confocal Laser Scanning Biological  
71 Microscopy FV1000 Fluoview (Olympus) and analyzed using Fluoview Ver. 2.0b Viewer  
72 (Olympus).

73

#### 74 **WST-8 assay**

75 WST-8 assay was performed using Cell Counting Kit – 8 (Sigma) according to manufacturer's  
76 instructions.

77
